# Supplementary material for: Type I myosins anchor actin assembly to the plasma membrane during clathrin-mediated endocytosis
Source: PubMed Central journal article supplement — J Cell Biol. 2019 Jan 18;218(4):1138–47. doi: 10.1083/jcb.201810005 (PMC6446854; doi:10.1083/jcb.201810005), 2019-01-18
Supplement: JCB_201810005_sm.pdf [file JCB_201810005_sm.pdf]

## Supplemental material

Pedersen and Drubin, <https://doi.org/10.1083/jcb.201810005>

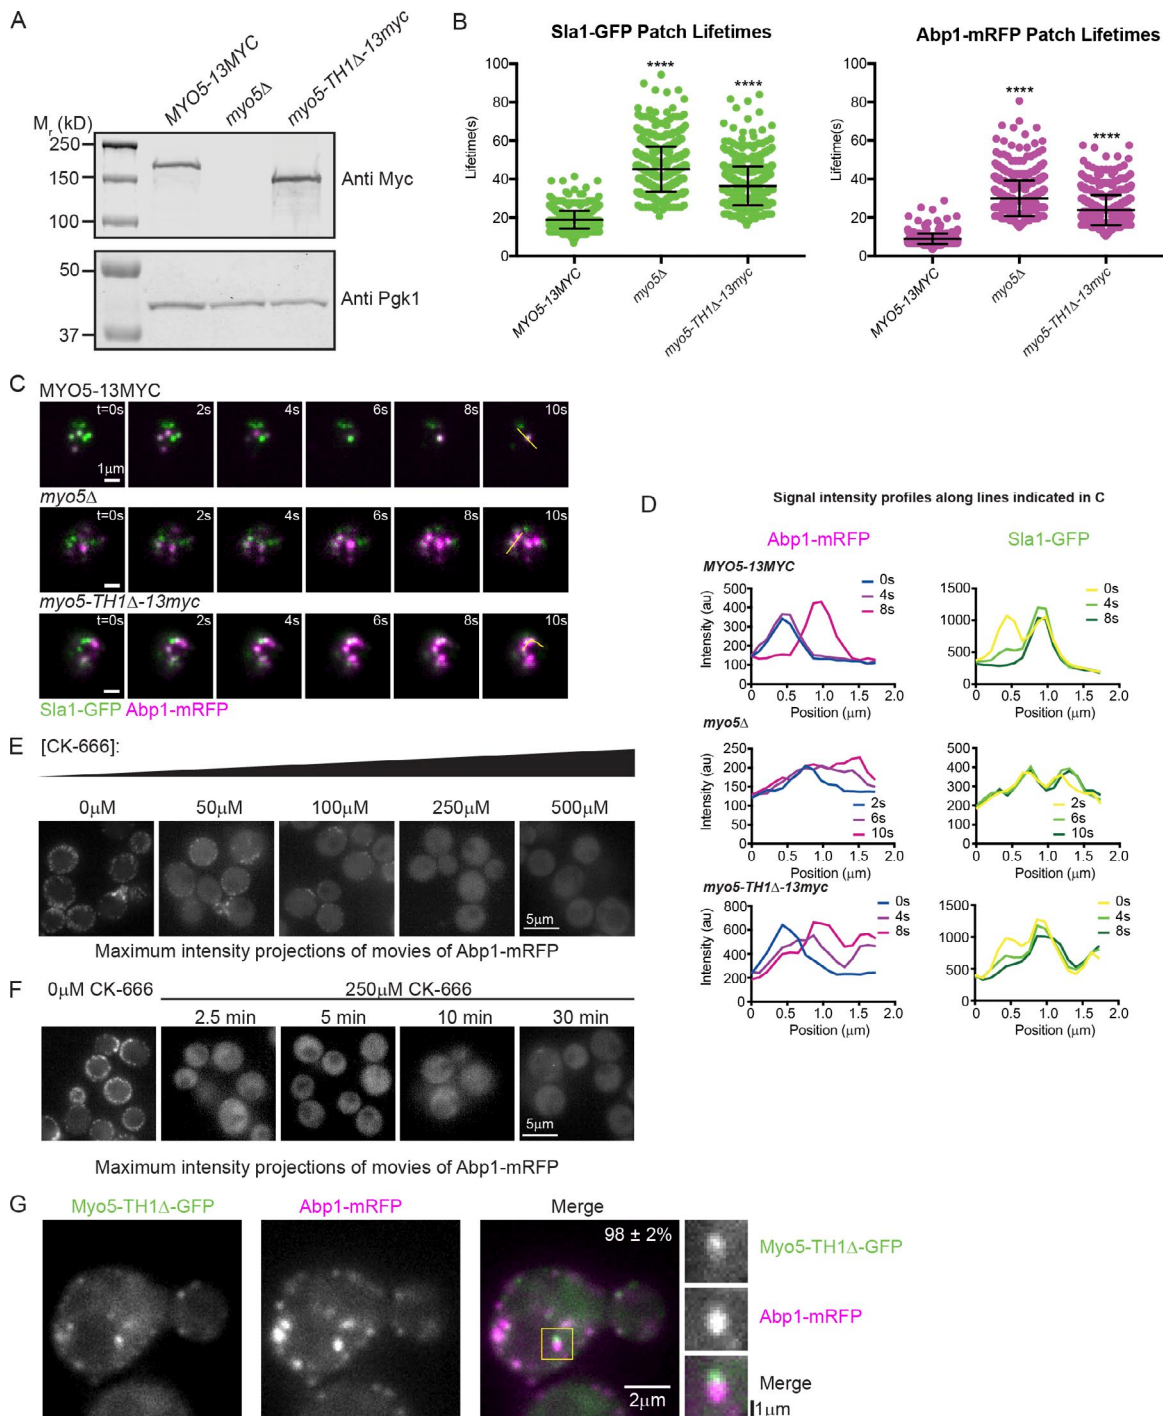

**Figure S1. Membrane-bound Myo5 restricts actin assembly and actin assembly factors to endocytic sites.** Related to Figs. 1 and 2. **(A)** Immunoblot of MYO5-13Myc, *myo5*Δ, and *myo5-TH1Δ-13myc* strains used in this study. Myo5 variants were recognized via a 13Myc epitope tag with the 9E10 anti myc antibody. Pgk1 was probed as a loading control. **(B)** Sla1-GFP and Abp1-mRFP patch lifetimes for each indicated genotype.  $n = 587$  (MYO5), 600 (*myo5*Δ), and 596 (*myo5-TH1Δ*) patches measured. Asterisks denote statistical significance compared with MYO5 as in Fig. 1C ( $F_{\text{Sla1}} = 1,212$  and  $F_{\text{Abp1}} = 1,342$ ). Error bars are SD. **(C)** Additional montages from TIRFM videos of cells of the indicated genotypes endogenously expressing Sla1-GFP (green) and Abp1-mRFP (magenta). Yellow lines indicate selections used for intensity profiles in D. See Video 2. **(D)** Abp1-mRFP fluorescence intensity profiles from the indicated time points along the line indicated in C. **(E)** Effects of increasing concentrations of CK-666 on assembly of endocytic actin networks, labeled by Abp1-mRFP in wild-type MYO5 cells. Cells were treated with the indicated concentration of CK-666 for 45 min. **(F)** Effects of increasing CK-666 treatment times on assembly of endocytic actin networks, labeled by Abp1-mRFP in wild-type MYO5 cells. **(G)** Still from an epifluorescence video of a *myo5-TH1Δ-GFP* (green) cell endogenously expressing Abp1-mRFP (magenta). The yellow box indicates an Abp1-mRFP comet with Myo5-TH1Δ-GFP at the tip. This selection is enlarged twofold and shown in grayscale at right. The percentage shown is the proportion of Abp1-mRFP comets with associated GFP signal ± SD;  $n = 153$  total comets observed. See Video 9. \*\*\*\*,  $P < 0.0001$ . All cells are *myo3Δ*.

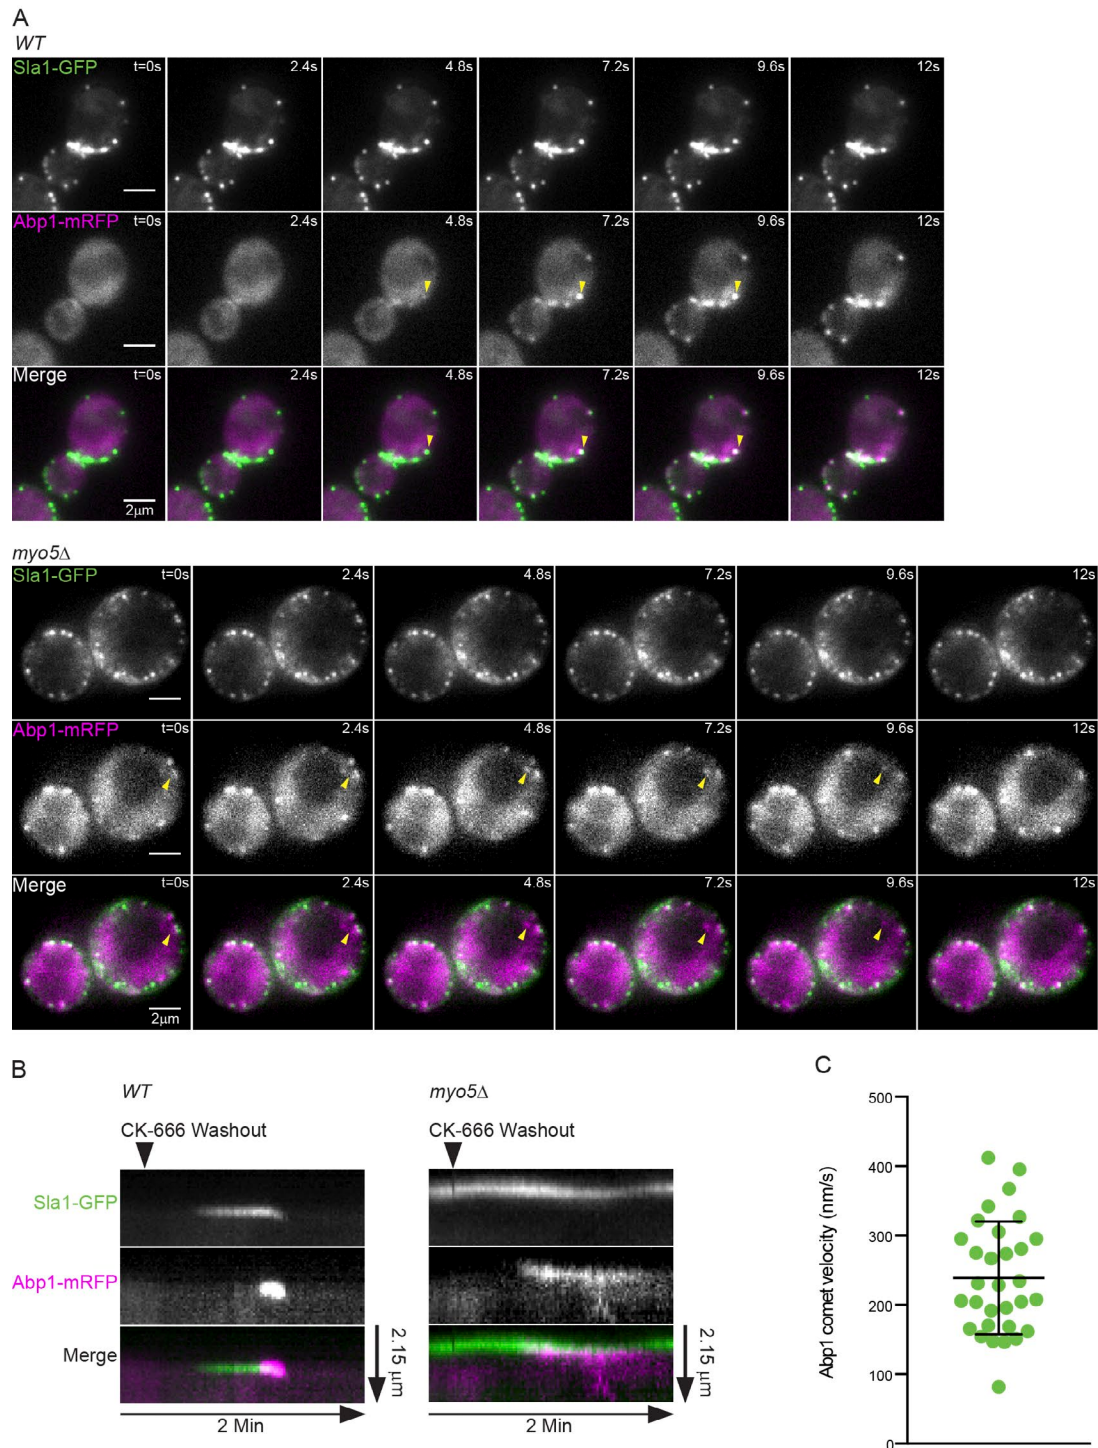

Figure S2. **Myo5 couples the assembling actin network to the PM during CME.** Related to Fig. 3. **(A)** Montages from epifluorescence videos of cells of the indicated genotypes endogenously expressing Sla1-GFP (green) and Abp1-mRFP (magenta) after washout of CK-666. Yellow arrowheads mark endocytic actin assembly events. **(B)** Kymographs of additional individual endocytic events after washout of CK-666 from the videos shown in A. **(C)** Quantification of the velocity of Abp1-mRFP actin comets as they leave the PM after washout of CK-666 in *myo5Δ* cells.  $n = 31$  comets tracked from 28 cells. Error bars are SD. See Video 10. All cells are *myo3Δ*.

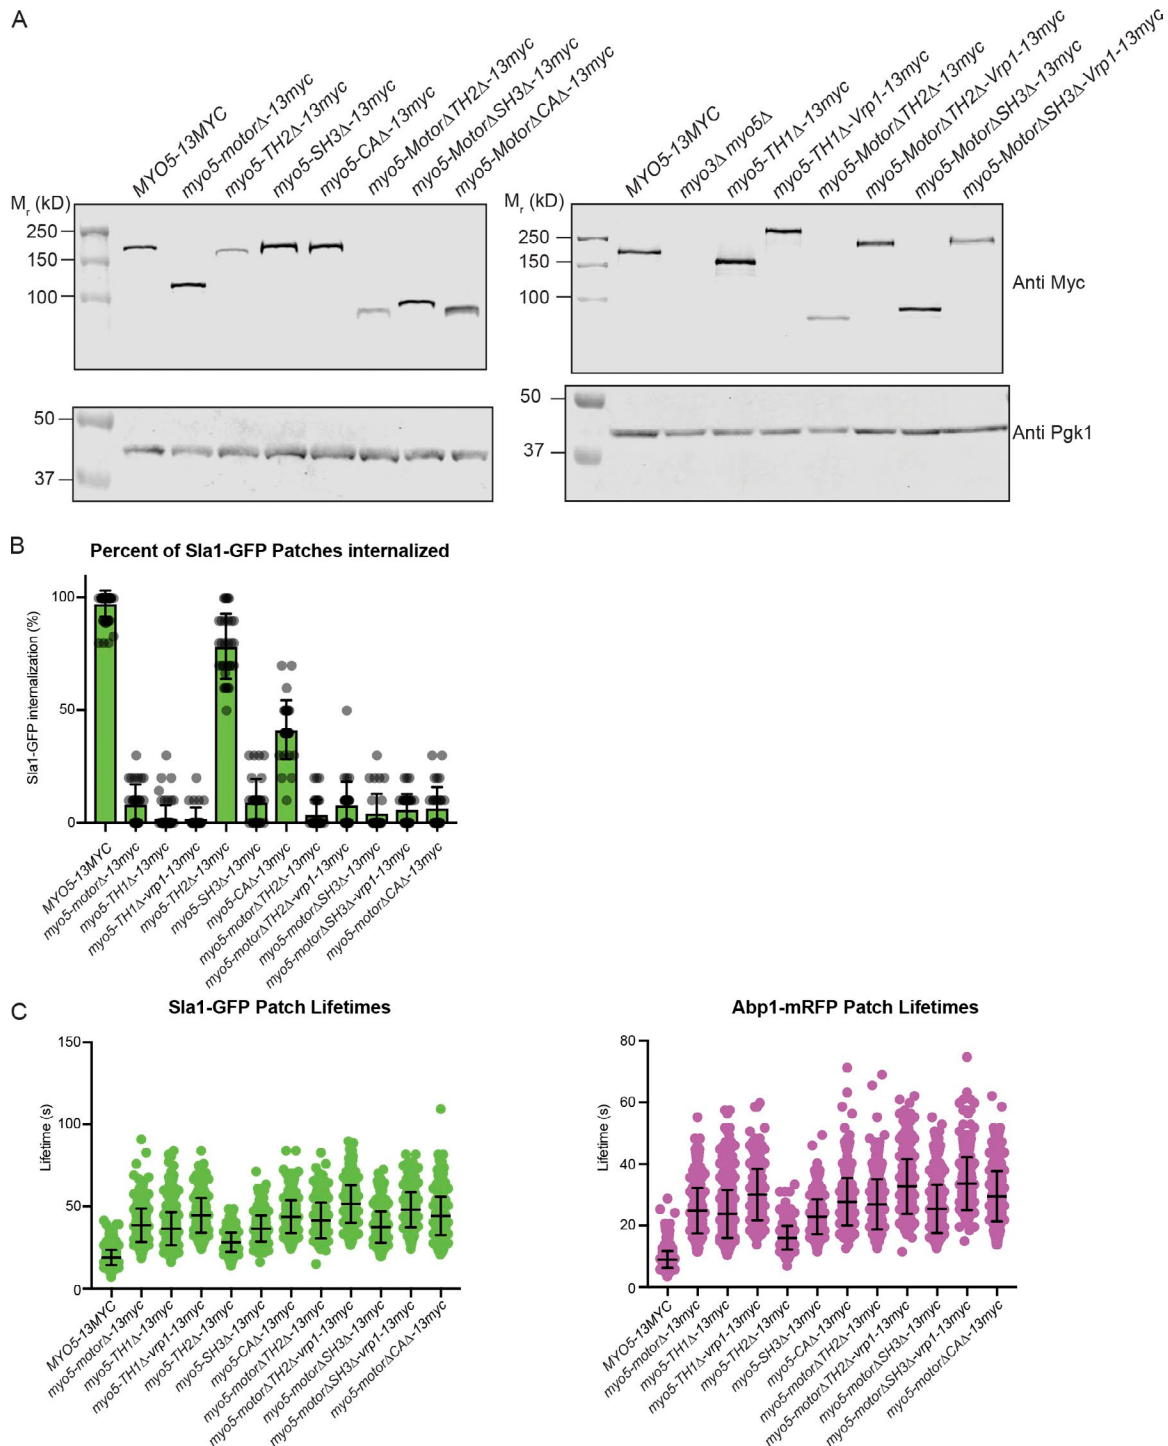

Figure S3. **Molecular determinants of myosin-mediated coupling of actin assembly to endocytic sites.** Related to Fig. 4. **(A)** Immunoblot of MYO5 truncation mutant strains used in this study. Myo5 variants were recognized via a 13Myc epitope tag with the 9E10 anti myc antibody. Pgk1 was probed as a loading control. **(B)** Quantification of the proportion of Sla1-GFP vesicles internalized in individual cells of each indicated genotype during a 2-min video. Data for MYO5 and *myo5-TH1Δ* are repeated from Fig. 1 D.  $n = 61$  (MYO5), 65 (*myo5-TH1Δ*), 31 (*myo5-TH2Δ*), and 30 cells for all other variants. All variants are statistically significantly different ( $P < 0.0001$ ) compared with MYO5 by one-way ANOVA ( $F = 641.2$ ) followed by Dunnett's test. **(C)** Sla1-GFP and Abp1-mRFP patch lifetimes for each indicated genotype. Data for MYO5 and *myo5-TH1Δ* are repeated from Fig. S1 B.  $n = 587$  (MYO5), 596 (*myo5-TH1Δ*), 306 (*myo5-TH2Δ*), and 300 patches measured for all other variants. All variants are statistically significantly different ( $P < 0.0001$ ) compared with MYO5 by one-way ANOVA ( $F_{\text{Sla1}} = 373.8$  and  $F_{\text{Abp1}} = 409.6$ ) followed by Dunnett's test. All cells analyzed were *myo3Δ*.

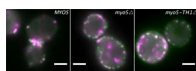

Video 1. **Epifluorescence videos of MYO5-13Myc, myo5Δ, and myo5-TH1Δ-13Myc cells endogenously expressing Sla1-GFP (green) and Abp1-mRFP (magenta).** Related to Fig. 1 (A–D). Motile cytoplasmic actin comets form in the absence of membrane-bound Myo5. Frames are separated by 1.15 s and played back at 15 frames per second (fps). Scale bars are 2 μm. All cells are *myo3Δ*.

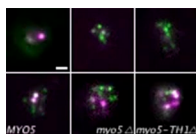

Video 2. **TIRFM videos of MYO5-13Myc, myo5Δ, and myo5-TH1Δ-13Myc cells endogenously expressing Sla1-GFP (green) and Abp1-mRFP (magenta).** Related to Fig. 1 (E and F) and Fig. S1 (C and D). Actin waves spread from CME sites across the PM in the absence of membrane-bound Myo5. Frames are separated by 1 s and played back at 15 fps. Scale bar is 1 μm. All cells are *myo3Δ*.

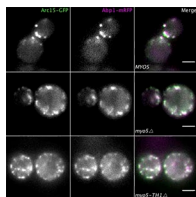

Video 3. **Epifluorescence videos of MYO5-13Myc, myo5Δ, and myo5-TH1Δ-13Myc cells endogenously expressing Arc15-GFP (green) and Abp1-mRFP (magenta).** Related to Figs. 2 A and 3A. Yellow arrowheads mark cytoplasmic actin comets emerging from the PM in mutants. The Arp2/3 complex colocalizes with cytoplasmic actin comets in *myo5* membrane-binding mutants. Frames are separated by 2 s and played back at 15 fps. Scale bars are 2 μm. All cells are *myo3Δ*.

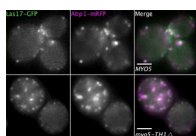

Video 4. **Epifluorescence videos of MYO5-13Myc and myo5-TH1Δ-13Myc cells endogenously expressing Abp1-mRFP (magenta) and Las17-GFP (green).** Related to Fig. 2 D. Individual channels are shown in grayscale at left. Las17 localizes to the tips of cytoplasmic actin comets in *myo5* membrane-binding mutants. Frames are separated by 1.15 s and played back at 15 fps. Scale bars are 2 μm. All cells are *myo3Δ*.

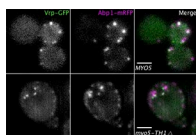

Video 5. **Epifluorescence videos of MYO5-13Myc and myo5-TH1Δ-13Myc cells endogenously expressing Abp1-mRFP (magenta) and Vrp1-GFP (green).** Related to Fig. 2 D. Individual channels are shown in grayscale at left. Vrp1 localizes to the tips of cytoplasmic actin comets in *myo5* membrane-binding mutants. Frames are separated by 2 s and played back at 15 fps. Scale bars are 2 μm. All cells are *myo3Δ*.

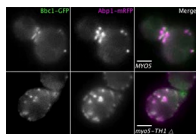

Video 6. **Epifluorescence videos of MYO5-13Myc and myo5-TH1Δ-13Myc cells endogenously expressing Abp1-mRFP (magenta) and Bbc1-GFP (green).** Related to Fig. 2 D. Individual channels are shown in grayscale at left. Bbc1 localizes to the tips of cytoplasmic actin comets in *myo5* membrane-binding mutants. Frames are separated by 1.15 s and played back at 15 fps. Scale bars are 2 μm. All cells are *myo3Δ*.

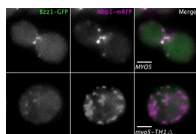

Video 7. **Epifluorescence videos of MYO5-13Myc and myo5-TH1Δ-13Myc cells endogenously expressing Abp1-mRFP (magenta) and Bzz1-GFP (green).** Related to Fig. 2 D. Individual channels are shown in grayscale at left. Bzz1 localizes to the tips of cytoplasmic actin comets in *myo5* membrane-binding mutants. Frames are separated by 1.15 s and played back at 15 fps. Scale bars are 2 μm. All cells are *myo3Δ*.

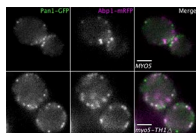

Video 8. **Epifluorescence videos of MYO5-13Myc and myo5-TH1Δ-13Myc cells endogenously expressing Abp1-mRFP (magenta) and Pan1-GFP (green).** Related to Fig. 2 D. Individual channels are shown in grayscale at left. Pan1 does not localize to the tips of cytoplasmic actin comets in myo5 membrane-binding mutants. Frames are separated by 2 s and played back at 15 fps. Scale bars are 2 μm. All cells are myo3Δ.

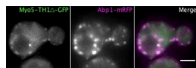

Video 9. **Epifluorescence video of a cell endogenously expressing Abp1-mRFP (magenta) and Myo5-TH1Δ-GFP (green).** Related to Fig. S1 G. Individual channels are shown in grayscale at left. Myo5-TH1Δ localizes to the tips of cytoplasmic actin comets. Frames are separated by 1.15 s and played back at 15 fps. Scale bars are 2 μm. The cell is myo3Δ.

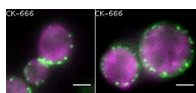

Video 10. **Epifluorescence videos of MYO5 and myo5Δ cells endogenously expressing Sla1-GFP (green) and Abp1-mRFP (magenta) after washout of CK-666 (time of washout indicated by text in the upper left).** Related to Fig. 3 D and Fig. S2. Yellow arrowheads mark endocytic actin assembly events. Actin flares internalize from the PM in myo5 membrane-binding mutants without coincident internalization of the endocytic coat. Frames are separated by 1.15 s and played back at 15 fps. Scale bars are 2 μm. All cells are myo3Δ.

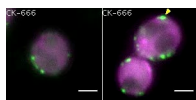

Video 11. **Epifluorescence videos of MYO5 and myo5Δ cells endogenously expressing Vrp1-GFP (green) and Abp1-mRFP (magenta) after washout of CK-666 (time of washout indicated by text in the upper left).** Related to Fig. 3 E. Yellow arrowhead marks an endocytic actin assembly event with fragmenting of the Vrp1-GFP patch. Actin flares internalize from the PM in myo5 membrane-binding mutants along with the WASP/myosin complex. Frames are separated by 1.15 s and played back at 15 fps. Scale bars are 2 μm. All cells are myo3Δ.

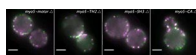

Video 12. **Epifluorescence videos of cells of the indicated genotypes endogenously expressing Sla1-GFP (green) and Abp1-mRFP (magenta).** Related to Fig. 4 C. Single domain deletion mutants of Myo5 still anchor the actin cytoskeleton to CME sites. Frames are separated by 1.15 s and played back at 15 fps. Scale bars are 2 μm. All cells are myo3Δ.

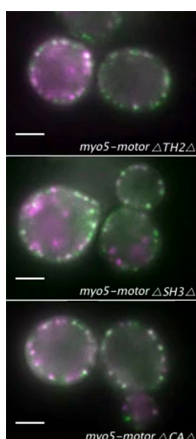

Video 13. **Epifluorescence videos of cells of the indicated genotypes endogenously expressing Sla1-GFP (green) and Abp1-mRFP (magenta).** Related to Fig. 4 D. Deletion of the Myo5 motor domain in tandem with a tail domain recapitulates cytoplasmic actin comet formation. Frames are separated by 1.15 s and played back at 15 fps. Scale bars are 2 μm. All cells are myo3Δ.

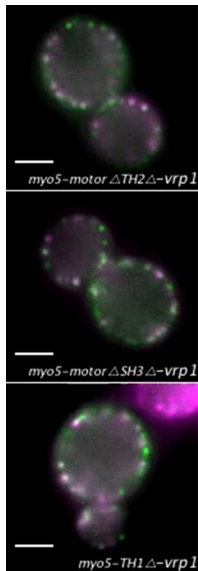

Video 14. **Epifluorescence videos of cells of the indicated genotypes endogenously expressing Sla1-GFP (green) and Abp1-mRFP (magenta).** Related to Fig. 4 E. Linkage of *myo5* actin-binding mutants but not *myo5* membrane-binding mutants to Vrp1 rescues cytoplasmic comet formation. Frames are separated by 1.15 s and played back at 15 fps. Scale bars are 2  $\mu$ m. All cells are *myo3* $\Delta$ .

Table S1. **Strains used in this study**

| Name    | Genotype                                                                                                                                                                                           | Source                                |
|---------|----------------------------------------------------------------------------------------------------------------------------------------------------------------------------------------------------|---------------------------------------|
| DDY1102 | <i>MATa/MATa his3-Δ200/his3-Δ200, leu2-3, 112/leu2-3, 112, ura3-52/ura3-52, ade2-1/ADE2, lys2-801/LYS2</i>                                                                                         | Drubin laboratory collection          |
| DDY5684 | <i>MATa/MATa his3-Δ200/his3-Δ200, leu2-3, 112/leu2-3, 112, ura3-52/ura3-52, MYO5/myo5Δ::HygMX, myo3Δ::cgLEU2/myo3Δ::cgLEU2, ABP1-mRFP::HIS3/ABP1-mRFP::HIS3, SLA1-GFP::KanMX6/SLA1-GFP::KanMX6</i> | This study                            |
| DDY5685 | <i>MATa his3-Δ200, leu2-3, 112, ura3-52, MYO5-13MYC::URA3, myo3Δ::cgLEU2, ABP1-mRFP::HIS3, SLA1-GFP::KanMX</i>                                                                                     | This study                            |
| DDY5686 | <i>MATa his3-Δ200, leu2-3, 112, ura3-52, myo5Δ::URA3, myo3Δ::cgLEU2, ABP1-mRFP::HIS3, SLA1-GFP::KanMX6</i>                                                                                         | This study                            |
| DDY5687 | <i>MATa his3-Δ200, leu2-3, 112, ura3-52, myo5-TH1Δ-13myc::URA3, myo3Δ::cgLEU2, ABP1-mRFP::HIS3, SLA1-GFP::KanMX6</i>                                                                               | This study                            |
| DDY5688 | <i>MATa his3-Δ200, leu2-3, 112, ura3-52, myo3Δ::cgLEU2, ABP1-mRFP::HIS3, ARC15-GFP::KanMX</i>                                                                                                      | This study                            |
| DDY5689 | <i>MATa his3-Δ200, leu2-3, 112, ura3-52, myo5Δ::URA3, myo3Δ::cgLEU2, ABP1-mRFP::HIS3, ARC15-GFP::KanMX</i>                                                                                         | This study                            |
| DDY5690 | <i>MATa his3-Δ200, leu2-3, 112, ura3-52, myo5-TH1Δ-13myc::URA3, myo3Δ::cgLEU2, ABP1-mRFP::HIS3, ARC15-GFP::KanMX</i>                                                                               | This study                            |
| DDY5691 | <i>MATa his3-Δ200, leu2-3, 112, ura3-52, myo3Δ::cgLEU2, ABP1-mRFP::HIS3, LAS17-GFP::HIS3</i>                                                                                                       | This study                            |
| DDY5692 | <i>MATa his3-Δ200, leu2-3, 112, ura3-52, myo5-TH1Δ-13myc::URA3, myo3Δ::cgLEU2, ABP1-mRFP::HIS3, LAS17-GFP::HIS3</i>                                                                                | This study                            |
| DDY5693 | <i>MATa his3-Δ200, leu2-3, 112, ura3-52, myo3Δ::cgLEU2, ABP1-mRFP::HIS3, VRP1-GFP::KanMX</i>                                                                                                       | This study                            |
| DDY5694 | <i>MATa his3-Δ200, leu2-3, 112, ura3-52, myo5-TH1Δ-13myc::URA3, myo3Δ::cgLEU2, ABP1-mRFP::HIS3, VRP1-GFP::KanMX</i>                                                                                | This study                            |
| DDY5695 | <i>MATa his3-Δ200, leu2-3, 112, ura3-52, myo3Δ::cgLEU2, ABP1-mRFP::HIS3, BBC1-GFP::HIS3</i>                                                                                                        | This study                            |
| DDY5696 | <i>MATa his3-Δ200, leu2-3, 112, ura3-52, myo5-TH1Δ-13myc::URA3, myo3Δ::cgLEU2, ABP1-mRFP::HIS3, BBC1-GFP::HIS3</i>                                                                                 | This study                            |
| DDY5697 | <i>MATa his3-Δ200, leu2-3, 112, ura3-52, myo3Δ::cgLEU2, ABP1-mRFP::HIS3, BZZ1-GFP::HIS3</i>                                                                                                        | This study                            |
| DDY5698 | <i>MATa his3-Δ200, leu2-3, 112, ura3-52, myo5-TH1Δ-13myc::URA3, myo3Δ::cgLEU2, ABP1-mRFP::HIS3, BZZ1-GFP::HIS3</i>                                                                                 | This study                            |
| DDY5699 | <i>MATa his3-Δ200, leu2-3, 112, ura3-52, myo3Δ::cgLEU, ABP1-mRFP::HIS3, PAN1-GFP::HIS3</i>                                                                                                         | This study                            |
| DDY5700 | <i>MATa his3-Δ200, leu2-3, 112, ura3-52, myo5-TH1Δ-13myc::URA3, myo3Δ::cgLEU2, ABP1-mRFP::HIS3, PAN1-GFP::HIS3</i>                                                                                 | This study                            |
| DDY4773 | <i>MATa his3-Δ200, leu2-3, 112, ura3-52, MYO5-13MYC::URA3, myo3Δ::cgLEU2</i>                                                                                                                       | <a href="#">Lewellyn et al., 2015</a> |
| DDY4828 | <i>MATa his3-Δ200, leu2-3, 112, ura3-52, myo5Δ::URA3, myo3Δ::cgLEU2</i>                                                                                                                            | <a href="#">Lewellyn et al., 2015</a> |
| DDY4775 | <i>MATa his3-Δ200, leu2-3, 112, ura3-52, myo5-TH1Δ-13myc::URA3, myo3Δ::cgLEU2</i>                                                                                                                  | <a href="#">Lewellyn et al., 2015</a> |
| DDY5701 | <i>MATa his3-Δ200, leu2-3, 112, ura3-52, myo5-motorΔ-13myc::URA3, myo3Δ::cgLEU2, ABP1-mRFP::HIS3, SLA1-GFP::KanMX</i>                                                                              | This study                            |
| DDY5702 | <i>MATa his3-Δ200, leu2-3, 112, ura3-52, myo5-TH2Δ-13myc::URA3, myo3Δ::cgLEU2, ABP1-mRFP::HIS3, SLA1-GFP::KanMX6</i>                                                                               | This study                            |
| DDY5703 | <i>MATa his3-Δ200, leu2-3, 112, ura3-52, myo5-SH3Δ-13myc::URA3, myo3Δ::cgLEU2, ABP1-mRFP::HIS3, SLA1-GFP::KanMX6</i>                                                                               | This study                            |
| DDY5704 | <i>MATa his3-Δ200, leu2-3, 112, ura3-52, myo5-CAΔ-13myc::URA3, myo3Δ::cgLEU2, ABP1-mRFP::HIS3, SLA1-GFP::KanMX</i>                                                                                 | This study                            |
| DDY5705 | <i>MATa his3-Δ200, leu2-3, 112, ura3-52, myo5-motorΔTH2Δ-13myc::URA3, myo3Δ::cgLEU2, ABP1-mRFP::HIS3, SLA1-GFP::KanMX</i>                                                                          | This study                            |
| DDY5706 | <i>MATa his3-Δ200, leu2-3, 112, ura3-52, myo5-motorΔSH3Δ-13myc::URA3, myo3Δ::cgLEU2, ABP1-mRFP::HIS3, SLA1-GFP::KanMX</i>                                                                          | This study                            |
| DDY5707 | <i>MATa his3-Δ200, leu2-3, 112, ura3-52, myo5-motorΔCAΔ-13myc::URA3, myo3Δ::cgLEU2, ABP1-mRFP::HIS3, SLA1-GFP::KanMX</i>                                                                           | This study                            |
| DDY4786 | <i>MATa his3-Δ200, leu2-3, 112, ura3-52, myo5-TH1Δ-vrp1-13myc::URA3, myo3Δ::cgLEU2, ABP1-mRFP::HIS3, SLA1-GFP::KanMX6</i>                                                                          | <a href="#">Lewellyn et al., 2015</a> |

Table S1. **Strains used in this study (Continued)**

| Name    | Genotype                                                                                                                       | Source     |
|---------|--------------------------------------------------------------------------------------------------------------------------------|------------|
| DDY5708 | <i>MATa his3-Δ200, leu2-3, 112, ura3-52, myo5-motorΔTH2Δ-vrp1-13myc::URA3, myo3Δ::cgLEU2, ABP1-mRFP::HIS3, SLA1-GFP::KanMX</i> | This study |
| DDY5709 | <i>MATa his3-Δ200, leu2-3, 112, ura3-52, myo5-motorΔSH3Δ-vrp1-13myc::URA3, myo3Δ::cgLEU2, ABP1-mRFP::HIS3, SLA1-GFP::KanMX</i> | This study |
| DDY5710 | <i>MATa his3-Δ200, leu2-3, 112, ura3-52, myo3Δ::cgLEU2, ABP1-mRFP::HIS3, SLA1-GFP::KanMX</i>                                   | This study |
| DDY5711 | <i>MATa his3-Δ200, leu2-3, 112, ura3-52, myo5Δ::URA3, myo3Δ::cgLEU2, ABP1-mRFP::HIS3, VRP1-GFP::KanMX6</i>                     | This study |
| DDY5712 | <i>MATa his3-Δ200, leu2-3, 112, ura3-52, myo5-TH1Δ-GFP::URA3, myo3Δ::cgLEU2, ABP1-mRFP::HIS3</i>                               | This study |

Table S2. **Plasmids used in this study**

| Plasmid | Description                                                                      |
|---------|----------------------------------------------------------------------------------|
| pDD2679 | pBluescript containing <i>myo5-motorΔTH2Δ-13myc</i> marked with <i>URA3</i>      |
| pDD2680 | pBluescript containing <i>myo5-motorΔSH3Δ-13myc</i> marked with <i>URA3</i>      |
| pDD2681 | pBluescript containing <i>myo5-motorΔCAD-13myc</i> marked with <i>URA3</i>       |
| pDD2682 | pBluescript containing <i>myo5-motorΔTH2Δ-vrp1-13myc</i> marked with <i>URA3</i> |
| pDD2683 | pBluescript containing <i>myo5-motorΔSH3Δ-vrp1-13myc</i> marked with <i>URA3</i> |
| pDD2684 | pBluescript containing <i>myo5-motorΔCAD-vrp1-13myc</i> marked with <i>URA3</i>  |

## Reference

Lewellyn, E.B., R.T.A. Pedersen, J. Hong, R. Lu, H.M. Morrison, and D.G. Drubin. 2015. An Engineered Minimal WASP-Myosin Fusion Protein Reveals Essential Functions for Endocytosis. *Dev. Cell.* 35:281–294. <https://doi.org/10.1016/j.devcel.2015.10.007>
